# Supplementary material
Source: PubMed Central journal article supplement (PMC3107317)
Supplement: 1105624108_pnas.201105624SI.pdf [file 1105624108_pnas.201105624SI.pdf]

# Supporting Information

Wu et al. 10.1073/pnas.1105624108

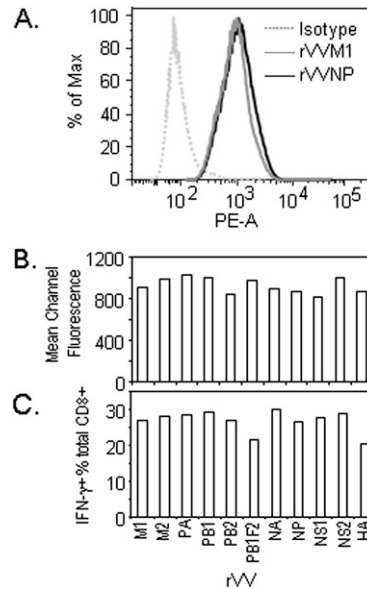

**Fig. S1.** Equivalent infection of B lymphoma cell lines (BLCLs) by influenza A virus (IAV) recombinant vaccinia viruses (rVVs). For screening antigenic IAV proteins, BLCL aliquots were infected individually with rVVs encoding each of the 11 IAV proteins at a multiplicity of infection (MOI) of 10 for 1 h at 37 °C in PBS containing 0.1% BSA (Sigma). The cells were then cultured in RF-10 for 4 h, washed, and further stained with mouse mAb TW2.3 (gift from Jonathan Yewdell and Jack Bennink, National Institutes of Health, Bethesda, MD). Fluorescence intensity of the rVV-M1- and rVV-nucleoprotein (NP)-infected BLCLs is shown as FACS plots for one experiment (A). Infected cells stained with only Phycoerythrin (PE)-conjugated goat anti-mouse Ig polyclonal Ab were included as controls (dotted line). The mean channel fluorescence values for 11 rVV-infected cells from two independent experiments were averaged and are shown in B. In C, the same rVV stocks used in A and B were used to infect the mouse L cells transfected with K<sup>b</sup> (L-K<sup>b</sup>; gift from James McCluskey, Melbourne University, Melbourne, Australia). Infected L-K<sup>b</sup> cells (for 5 h) were coincubated (for another 4 h) with a murine CD8<sup>+</sup> T-cell line specific for an rVV epitope. As an indirect indication of the efficiency of infection, T-cell activation because of rVV antigen presentation was assessed by the IFN- $\gamma$  intracellular cytokine staining (ICS) assay. This is representative of two independent experiments.



**Table S2. Conservancy of the peptide sequences within H1N1 and H3N2 viruses**

| Peptide   | Peptide sequence         | Frequency (%) of peptide variants |                  |      |                 |
|-----------|--------------------------|-----------------------------------|------------------|------|-----------------|
|           |                          | H3N2                              | Australian* H3N2 | H1N1 | Australian H1N1 |
| NP140–150 | HSNLNDATYQR <sup>†</sup> | 33                                | 64               | 18   | —               |
| NP140–150 | HSNLNDITTYQR             | 67                                | 31               | 82   | 61              |
| NP140–150 | HSNLNATTYQR              | —                                 | —                | —    | 39              |
| NP140–150 | HSNLNDVTYQR              | —                                 | 3                | —    | —               |
| NP219–228 | YERM CNILK <sup>†</sup>  | 100                               | 100              | 100  | 100             |
| NP336–344 | AAFEDLRLL <sup>†</sup>   | 92                                | 100              | 92   | 100             |
| NP336–344 | AAFEDLRVL                | 8                                 | —                | —    | —               |
| NP336–344 | VAFEDLRLL                | —                                 | —                | 8    | —               |
| NP404–412 | GQISIQPTF <sup>†</sup>   | 23                                | 65               | 75   | 17              |
| NP404–412 | GQISVQPAF                | 8                                 | —                | —    | —               |
| NP404–412 | GQTSVQPTF                | 23                                | 36               | —    | —               |
| NP404–412 | GQISTQPTF                | —                                 | —                | 16   | 48              |
| NP404–412 | GQISVQPTF                | 62                                | —                | —    | 39              |
| NP404–412 | DQISVQPTF                | —                                 | —                | 8    | —               |

H1N1 strains used for comparison with PR8-derived peptides included the full-length sequences of vaccine influenza strains available from National Center for Biotechnology Information (NCBI) influenza virus resource database: A/New Jersey/8/76, A/USSR/90/77, A/USSR/92/77, A/Brazil/11/78, A/Dunedin/27/83, A/Chile/1/83, A/Taiwan/1/86, A/Singapore/6/86, A/Texas/36/91, A/Bayern/7/95, A/Beijing/262/95, A/New Caledonia/20/99, A/Brisbane/59/2007, and A/California/7/2009 (pdm). H3N2 strains used for comparison with PR8-derived peptides included the full-length sequences of vaccine influenza strains A/Victoria/3/75, A/Texas/1/77, A/Bangkok/1/79, A/Philippines/2/82, A/Leningrad/360/86, A/Shanghai/11/87, A/Beijing/353/89, A/Beijing/32/92, A/Shangdong/9/93, A/Sydney/5/97, A/Moscow/10/99, A/Wellington/1/2004, A/California/7/2004, and A/Wisconsin/67/2005.

\*Australian H1N1 ( $n = 24$ ) and H3N2 ( $n = 40$ ) sequences included the full-length sequences of viruses from 2000 to 2010 available from the NCBI influenza virus resource database accessed on December 1, 2010. Search criteria were Australia, NP, H3N2/H1N1, nonidentical sequences excluded, full length only, and from 2000 to 2010.

<sup>†</sup>These peptide sequences were identified and used in this study.
